# Supplementary material
Source: Springer Nature journal article supplement (https://www.springermedizin.de/resource/supplementary/12967_2007_188_MOESM3_ESM.pdf/9575898)

**A**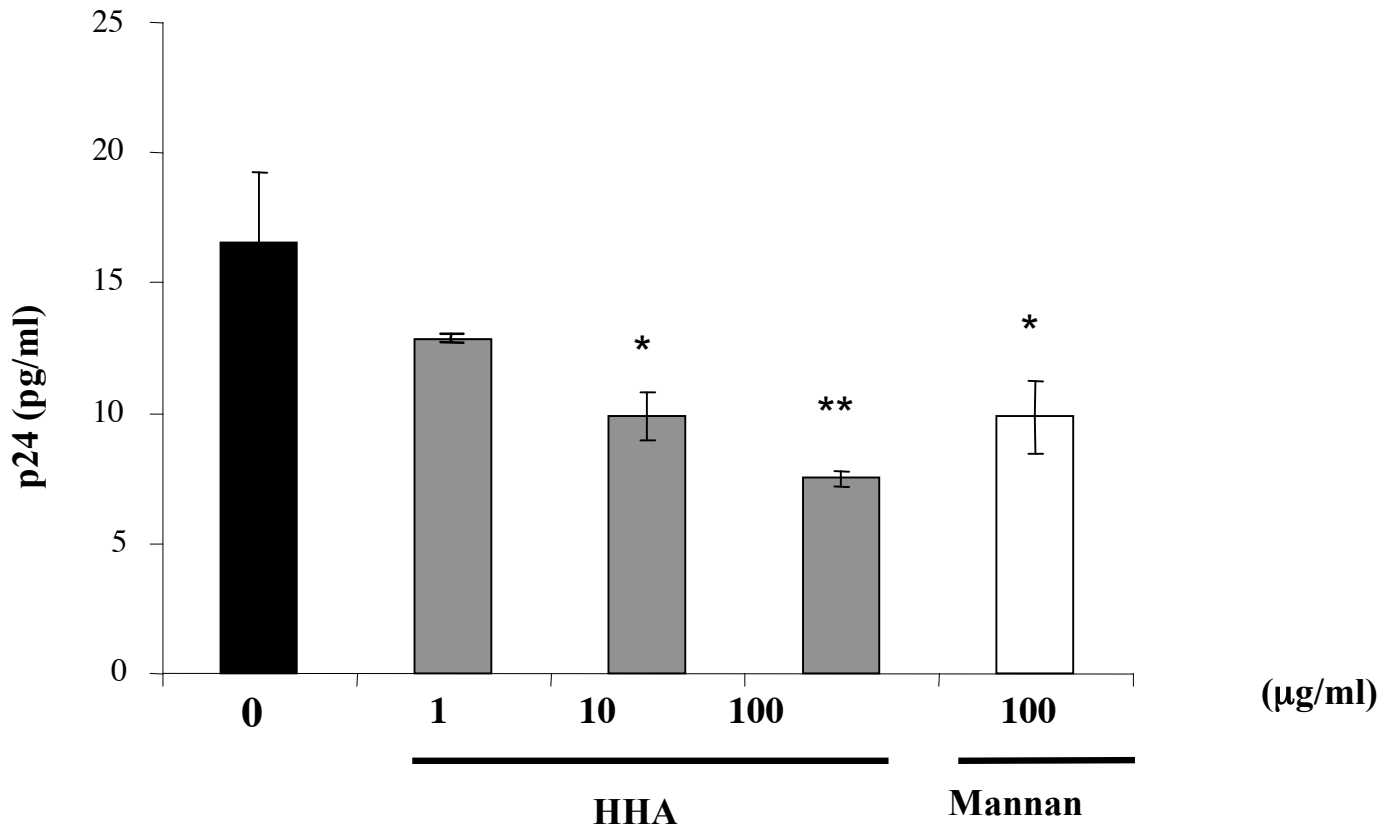**B**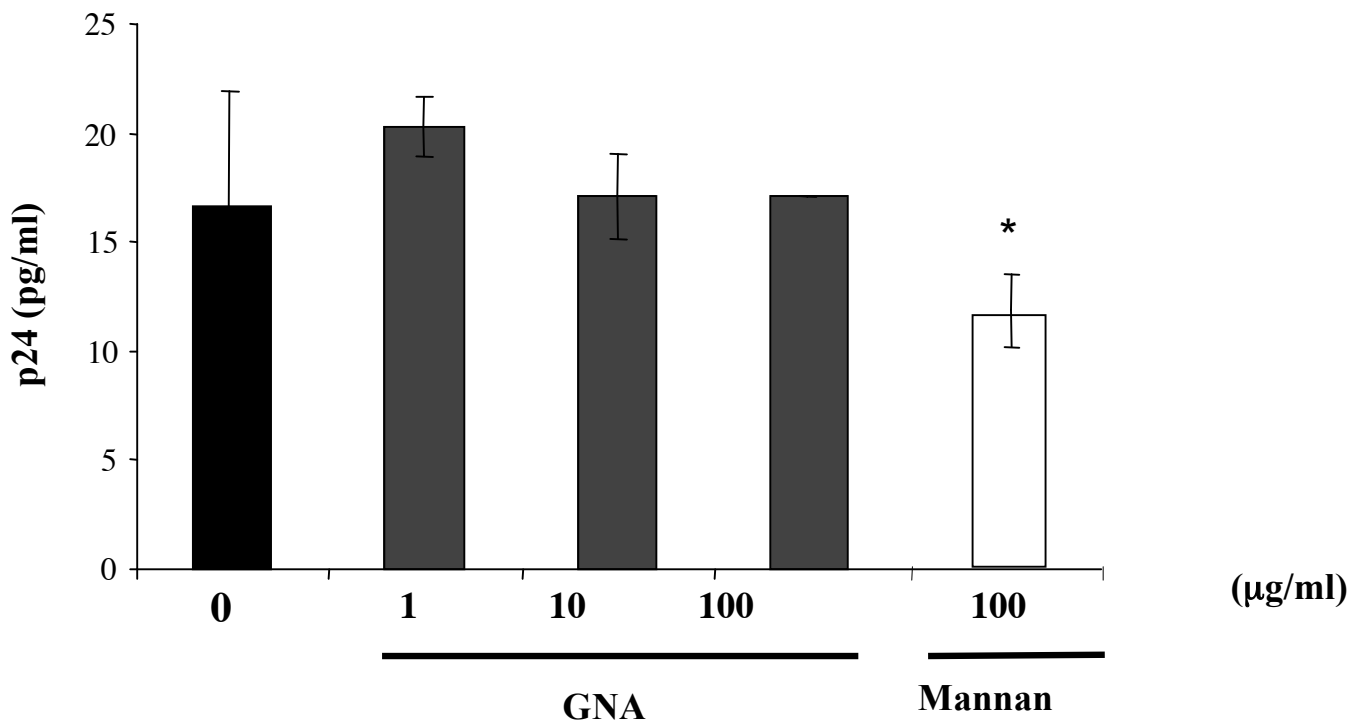

Supplement: MOESM3 [file 9575898]
